# Supplementary material for: Dynamic Bayesian-Network-Based Approach to Enhance the Performance of Monthly Streamflow Prediction Considering Nonstationarity
Source: MDPI journal article supplement (doi:10.3390/w16071064), 2024-04-07
Supplement: s1 [file s1]

## Supporting Information for

# Dynamic Bayesian-Network-Based Approach to Enhance the Performance of Monthly Streamflow Prediction Considering Nonstationarity

**Authors:** Wen Zhang <sup>1</sup>, Pengcheng Xu <sup>1,\*</sup>, Chunming Liu <sup>2</sup>, Hongyuan Fang <sup>1</sup>,  
Jianchun Qiu <sup>1</sup> and Changsheng Zhang <sup>3</sup>

<sup>1</sup> College of Hydraulic Science and Engineering, Yangzhou University, Yangzhou 225009, China

<sup>2</sup> River Embankment Sluice Management Center of Jiangyin, Wuxi 214023, China

<sup>3</sup> Jiangsu Hydraulic Engineering Construction Co., Ltd., Yangzhou 225009, China

(\* Correspondence: m18994113495@163.com)

**Table S1** Control parameters for support vector regression (SVR) for stationary and nonstationary cases

| Case          | Period    | Control parameters |                    |
|---------------|-----------|--------------------|--------------------|
|               |           | cost <sup>a</sup>  | gamma <sup>b</sup> |
| Nonstationary | 1961-2000 | 100                | 0.01               |
|               | 1963-2002 | 1000               | 0.001              |
|               | 1965-2004 | 100                | 0.01               |
|               | 1967-2006 | 100                | 0.01               |
|               | 1969-2008 | 100                | 0.001              |
|               | 1971-2010 | 100                | 0.001              |
|               | 1973-2012 | 100                | 0.001              |
|               | 1975-2014 | 1000               | 0.001              |
|               | 1963-2002 | 1000               | 0.1                |
| Stationary    | 1961-2000 | 1000               | 0.001              |

<sup>a</sup>cost: cost of constraints violation (default: 1)—it is the ‘C’-constant of the regularization term in the Lagrange formulation.

<sup>b</sup>gamma: parameter needed for all kernels.

**Table S2** Control parameters for adaptive-network-based fuzzy inference system (ANFIS) for stationary and nonstationary cases.

| Case          | Period    | Control parameters      |                       |                        |                      |
|---------------|-----------|-------------------------|-----------------------|------------------------|----------------------|
|               |           | num.labels <sup>a</sup> | max.iter <sup>b</sup> | step.size <sup>a</sup> | type.mf <sup>b</sup> |
| Nonstationary | 1961-2000 | 5                       | 20                    | 0.01                   | 3                    |
|               | 1963-2002 | 7                       | 20                    | 0.01                   | 3                    |
|               | 1965-2004 | 5                       | 10                    | 0.01                   | 3                    |
|               | 1967-2006 | 5                       | 20                    | 0.01                   | 3                    |
|               | 1969-2008 | 5                       | 10                    | 0.01                   | 3                    |
|               | 1971-2010 | 5                       | 10                    | 0.01                   | 3                    |
|               | 1973-2012 | 5                       | 10                    | 0.01                   | 3                    |
|               | 1975-2014 | 5                       | 10                    | 0.01                   | 3                    |
| Stationary    | 1961-2000 | 10                      | 10                    | 0.01                   | 3                    |

<sup>a</sup>num.labels: a positive integer to determine the number of labels (linguistic terms);

<sup>b</sup>max.iter: a positive integer to determine the maximal number of iterations;

<sup>c</sup>step.size: the step size of the gradient descent;

<sup>c</sup>type.mf: type of the membership function.

**Table S3.** Results of various performance metrics evaluated for different models during the model testing period from 2001 to 2015 at Huaihe River Basin.

| Performance metrics | Models        |            |               |            |               |            |
|---------------------|---------------|------------|---------------|------------|---------------|------------|
|                     | Nonstationary | Stationary | Nonstationary | Stationary | Nonstationary | Stationary |
|                     | GM-BN         | GM-BN      | SVR           | SVR        | ANFIS         | ANFIS      |
| R <sup>2</sup>      | <b>0.97</b>   | 0.88       | 0.89          | 0.58       | 0.86          | 0.85       |
| NRMSE               | <b>0.225</b>  | 0.309      | 0.321         | 0.87       | 0.43          | 0.95       |
| NSE                 | <b>0.96</b>   | 0.88       | 0.876         | 0.39       | 0.84          | 0.25       |
| d                   | <b>0.98</b>   | 0.91       | 0.97          | 0.82       | 0.98          | 0.86       |
| KGE                 | <b>0.97</b>   | 0.88       | 0.88          | 0.73       | 0.89          | 0.28       |

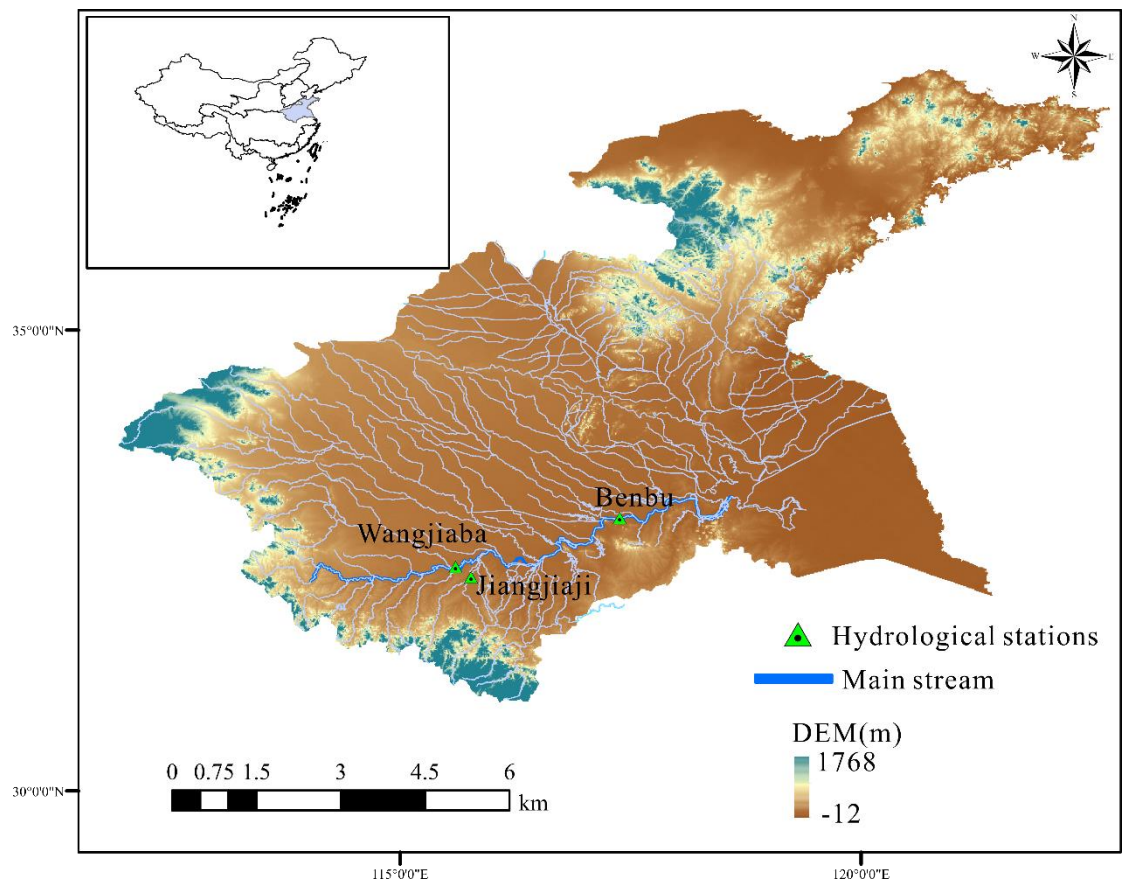

**Figure S1** Plot of the Huaihe River Basin, China.
